# Supplementary material for: Polyethylene fibers containing directional microchannels for passive radiative cooling
Source: Royal Society of Chemistry journal article supplement (doi:10.1039/d3mh01881d), 2024-01-01
Supplement: d3mh01881d1.pdf [file d3mh01881d1.pdf]

## Supporting Information

### **Polyethylene fibers containing directional microchannels for passive radiative cooling**

*Mengxia Sun, Fei Peng, Shanshan Xu, Xianhu Liu, Kun Dai, Guoqiang Zheng\**,

*Chuntai Liu and Changyu Shen*

School of Materials Science and Engineering, Key Laboratory of Material Processing and Mold (Ministry of Education), National Engineering Research Center for Advanced Polymer Processing Technology, Zhengzhou University, Zhengzhou 450000, PR China

E-mail address: [gqzheng@zzu.edu.cn](mailto:gqzheng@zzu.edu.cn) (G. Zheng)

### Note S1 Calculation of shear rate

The shear rate of PFCDM can be calculated by:

$$\gamma = \frac{6q}{\pi R^3} \quad (1)$$

where  $R$  is inner diameter of die exit and  $q$  is volume rate of the extruder during extrusion. Herein,  $q$  and  $R$  were respectively 15 cm<sup>3</sup>/min, 3 mm. Therefore,  $\gamma$  is 17.8 rad/s.

### Note S2 Porosity measurement

Porosity of PFCDM was estimated via the ethanol saturation method. First, the mass and volume of PFCDM were measured, respectively denoted as  $W_1$  and  $V_1$ , then the measured PFCDM was placed in anhydrous ethanol. After PFCDM fully absorbed anhydrous ethanol to equilibrium, PFCDM was taken out and the residual ethanol on the surface of PFCDM was wiped with filter paper. Then PFCDM was weighed again (recorded as  $W_2$ ). Finally, the porosity was calculated by the following equation :

$$p o r o s i t y = \frac{W_2 - W_1}{V_1 \times \rho} \times 100 \% \quad (2)$$

where  $\rho$  is the ethanol density. The final porosity was obtained by measuring 10 samples to obtain the mean and standard deviation.

### Note S3 Calculation of cooling power

$$P_{cooling} = P_{rad}(T) - P_{sun} - P_{atm}(T_{amb}) - P_{non-rad} \quad (3)$$

$$P_{rad}(T) = 2\pi \int_0^{2\pi} d\theta \sin \theta \cos \theta \int_{2.5\mu m}^{25\mu m} I_{BB}(T, \lambda) \varepsilon(\lambda, \theta) d\lambda \quad (4)$$

$$I_{BB}(T, \lambda) = \frac{2hc^2}{\lambda^5} \frac{1}{e^{hc/\lambda K_B T} - 1} \quad (5)$$

where here  $\varepsilon(\lambda, \theta)$  is the spectral and angular emissivity of the cooler.  $h$  is Planck's constant,  $K_B$  is Boltzmann constant, and  $c$  is the speed of light.

$$P_{sun} = \int_{0.3\mu m}^{2.5\mu m} I_{solar}(\lambda) \varepsilon(\lambda, 0) d\lambda \quad (6)$$

$$P_{atm}(T_{amb}) = 2\pi \int_0^{\frac{\pi}{2}} d\theta \sin \theta \cos \theta \int_{2.5\mu m}^{25\mu m} I_{BB}(T, \lambda) \varepsilon(\lambda, \theta) \varepsilon_{atm}(\lambda, \theta) d\lambda \quad (7)$$

$\varepsilon_{atm}(\lambda, \theta)$  is the spectral and angular emissivity of the atmosphere, which can be defined as:

$$\varepsilon_{atm}(\lambda, \theta) = 1 - t(\lambda)^{\frac{1}{\cos \theta}} \quad (8)$$

where  $t(\lambda)$  is the atmospheric transmittance in the zenith direction, which can be obtained by MODTRAN of Mid-Latitude Summer Atmosphere Model (MODTRAN (spectral.com)).

$$P_{non-rad} = h_c(T_{amb} - T) \quad (9)$$

where  $h_c$  is the coefficient of the non-radiative heat.

#### **Note S4 Comparison of wearable PRC fabrics and PRC aerogels for energy saving buildings**

(1) PRC fabrics and PRC aerogels have high solar reflectivity in order to avoid heating from solar radiation. In addition, both PRC fabrics and PRC aerogels improve thermal insulation by introducing porous structure. Therefore, both PRC fabrics and PRC aerogels have radiative cooling properties.

(2) Although both PRC fabrics and PRC aerogels have microporous structures, PRC fabrics have smaller pore sizes than PRC aerogels. On the one hand, this work achieves high reflectivity through microstructures with similar wavelength size to ultraviolet, mid-infrared and visible light<sup>1</sup>, so the diameter of pore is smaller than that of PRC aerogels. On the other hand, because PRC fabric is used in the field of human wear, it is quite different from PRC aerogels application scenarios. Therefore, the overall size

of PRC fabric is smaller than PRC aerogel, and it also takes into account the functions of air permeability, softness and comfort to ensure the experience of the wearer while ensuring the radiative cooling performance.

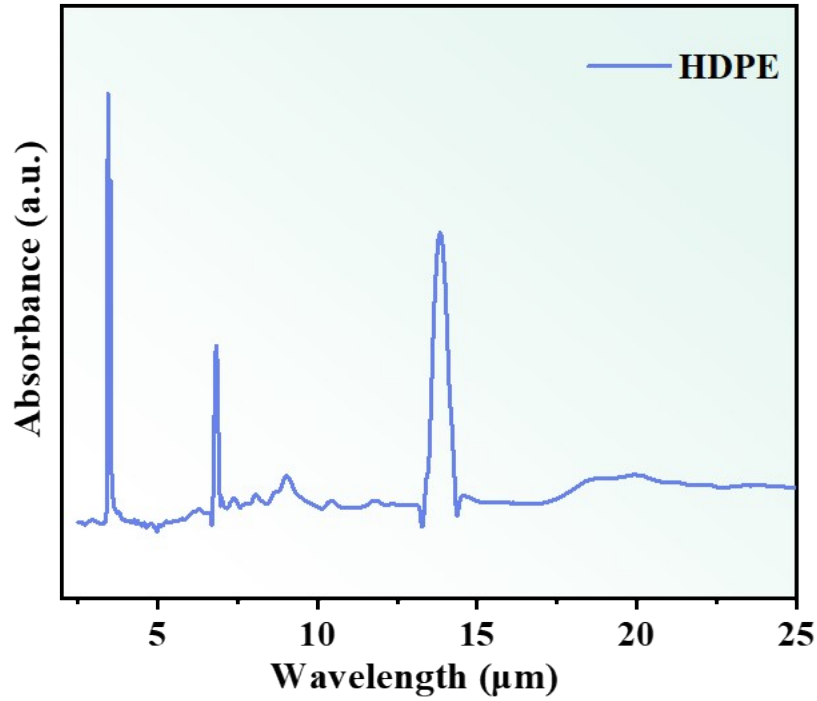

**Fig. S1** The infrared result shows that the absorption vibration peaks are far away from 8-13 μm. Therefore, HDPE provides a strong mid-infrared emissivity at atmospheric window.

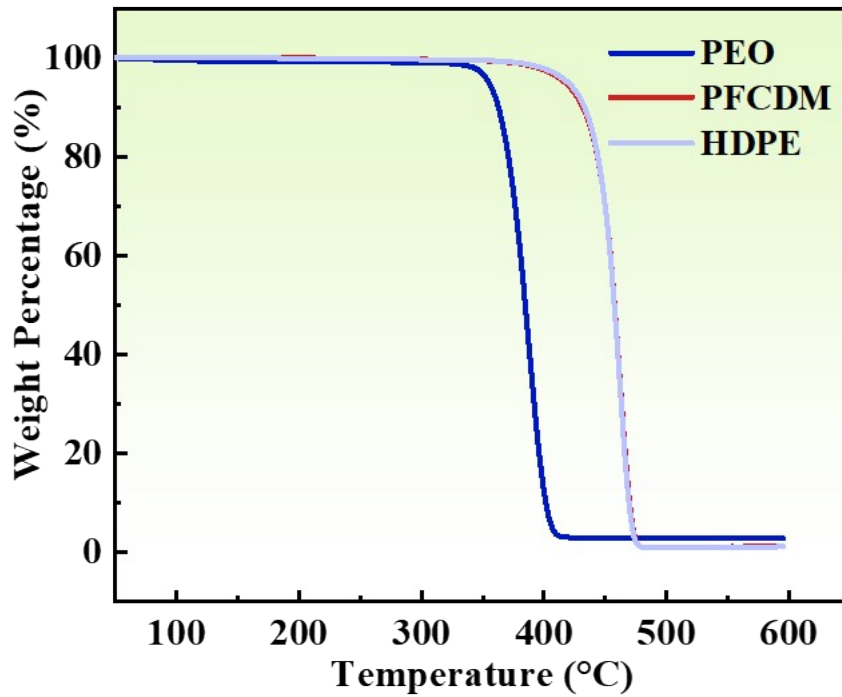

**Fig. S2** TG results show that PEO in PFCDM has been leached.

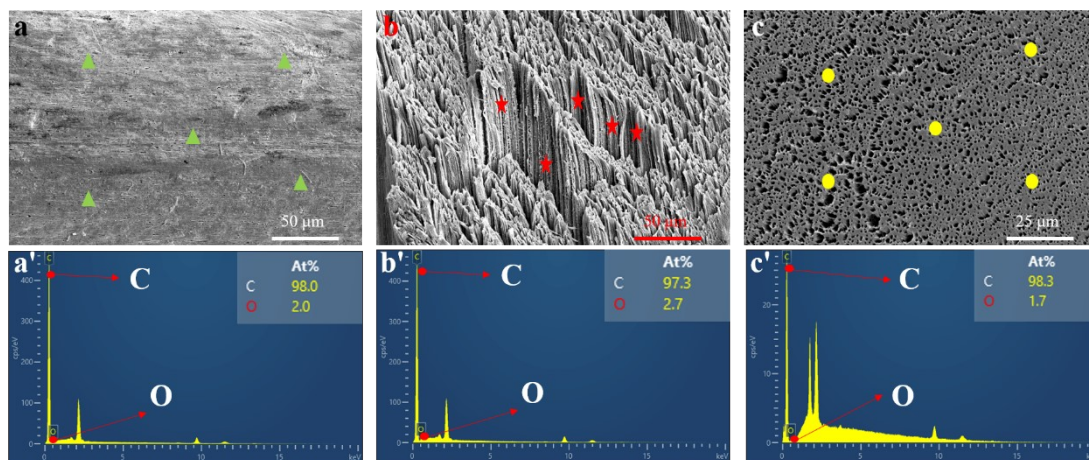

**Fig. S3** Oxygen content measure results of PFCDM. The oxygen content of PFCDM (a) surface, (b) longitudinal section and (c) cross section was measured by point scanning mode.

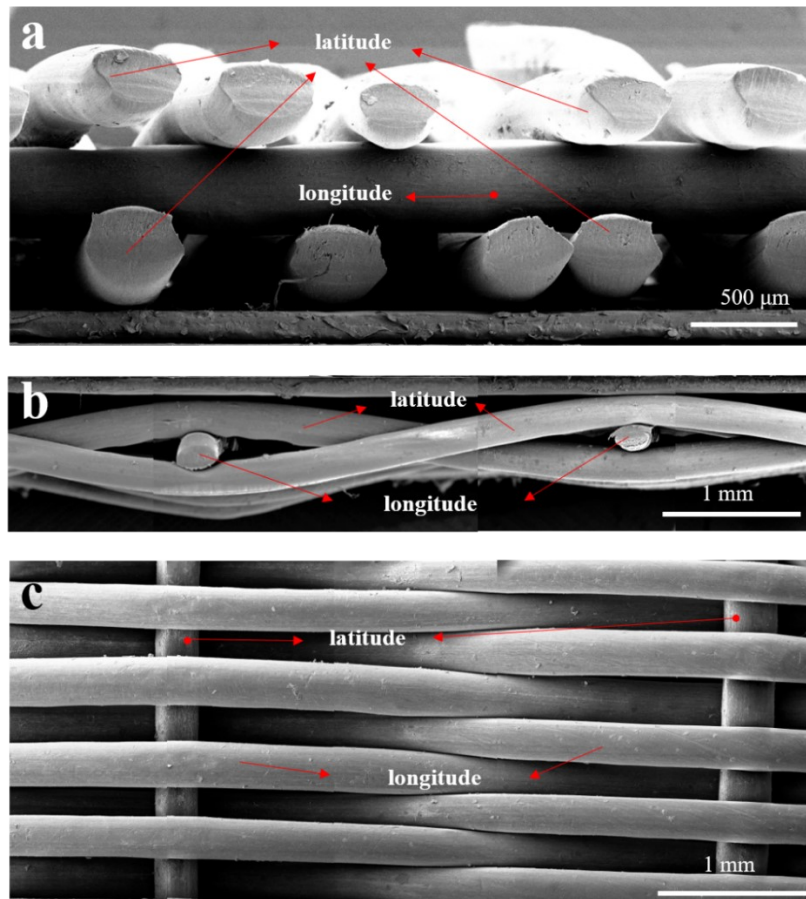

**Fig S4** Morphology of PFCDM fabric. (a) Cross section parallel to the longitude. (b) Cross section parallel to the latitude. (c) Surface of PFCDM fabric.

The warp and weft weaving method was used in this work, and the warp lines were about 3.5 mm apart as shown in Fig. S4.

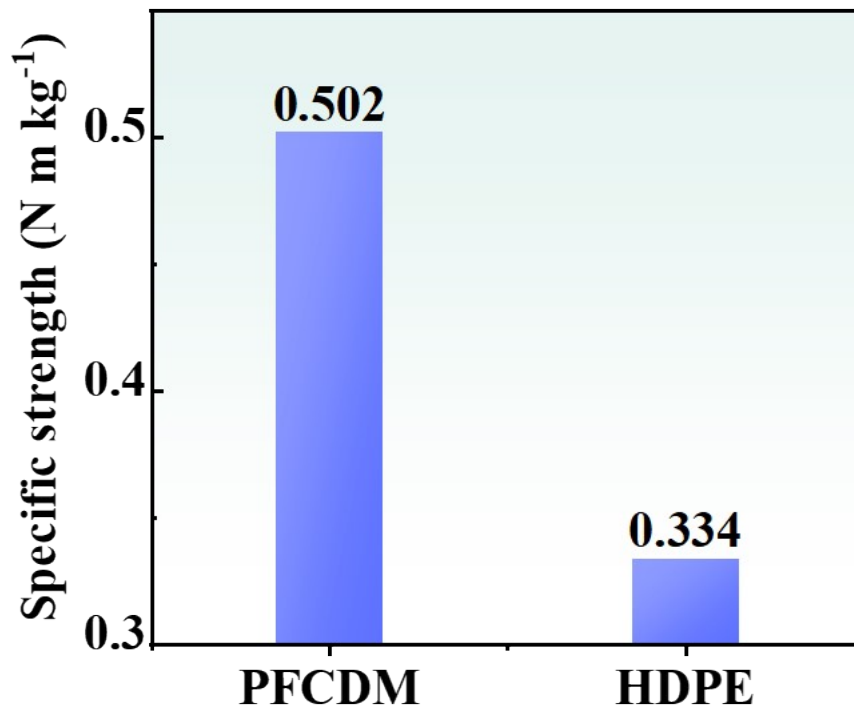

**Fig. S5** The specific strength of PFCDM is 0.502 N m kg<sup>-1</sup> and that of HDPE is 0.334 N m kg<sup>-1</sup>

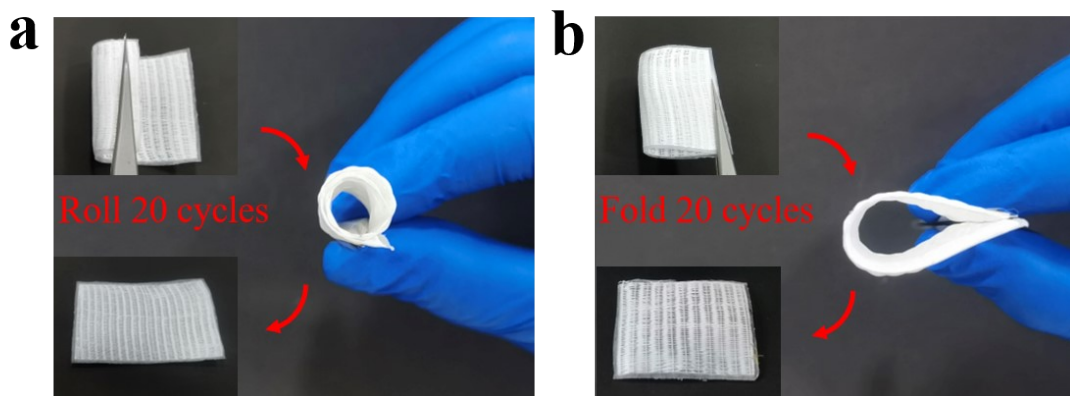

**Fig. S6** PFCDM fabric can maintain its original shape after being a) rolled and b) folded 20 times

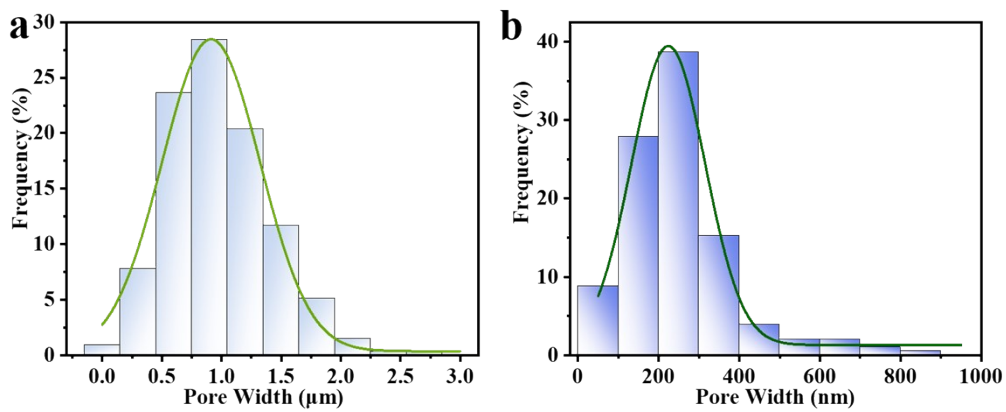

**Fig. S7** The diameter distribution of a) microchannels and b) microgrooves.

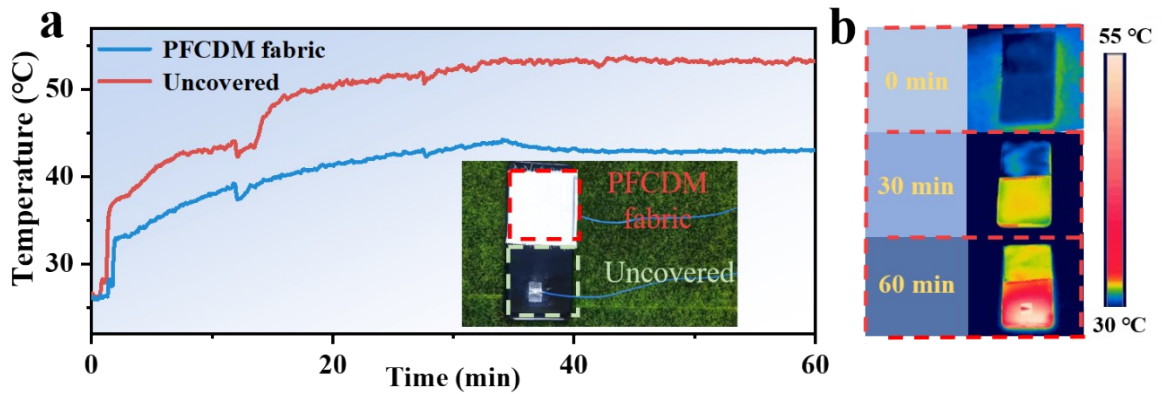

**Fig. S8** a) Measured temperature of the phones uncovered as well as covered with PFCDM fabric. b) Infrared images of aforementioned phone were taken every 30 minutes.

During the test, a common software was running in the mobile phone to simulate normal use. The results show that PFCDM fabric can not only prevent the phone from overheating but also prevent wearer from feeling the heat of phone.



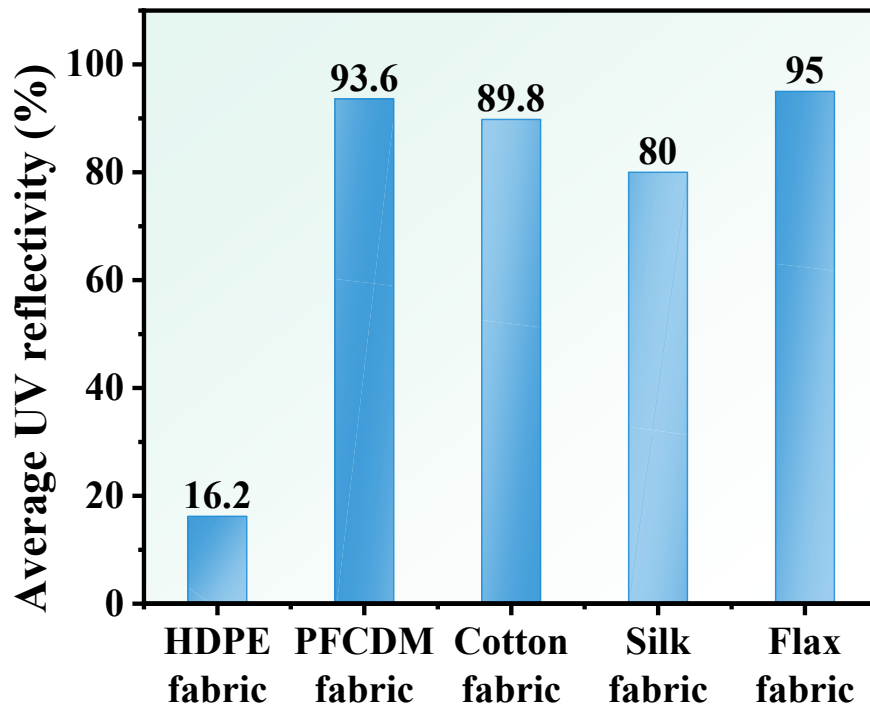

Fig S9 Average UV reflectivity of different fabrics.

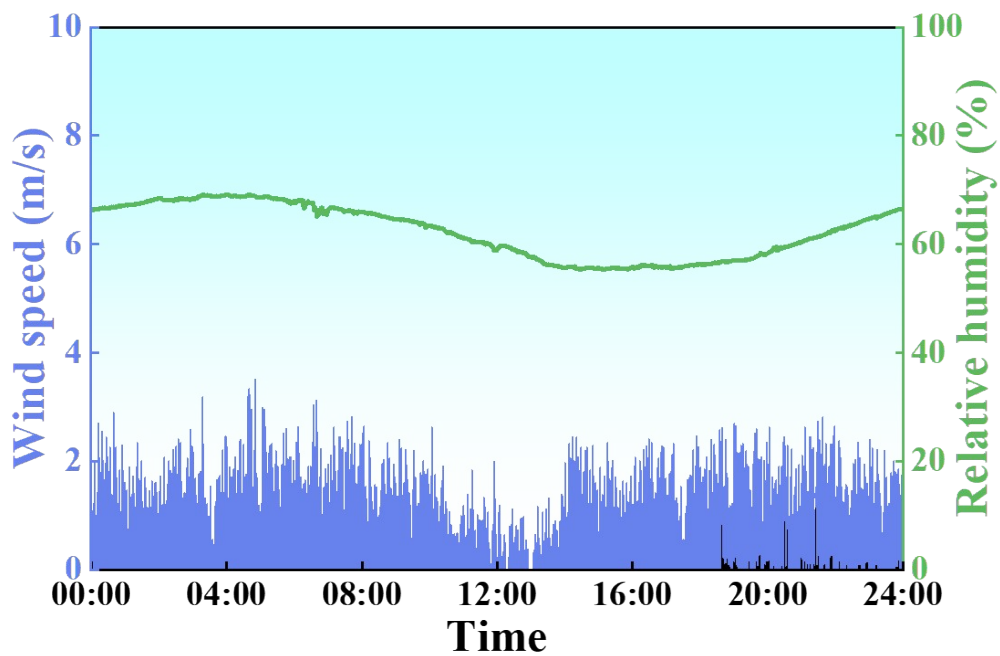

Fig. S10 Corresponding wind speed and relative humidity when performing outdoor PRC measurement.

## Supporting Videos

**Video S1** Remarkable air permeability and hydrophobicity of PFCDM fabric

**Video S2** Application for human radiative cooling

**Video S3.1** Self-cleaning property of fabrics contaminated by powders

**Video S3.2** Self-cleaning property of fabrics contaminated by droplets

According to Table S1, PFCDM fabric has the greatest temperature drop and outstanding cooling power compared to reported PRC fabric work. It is worth noting that we further compared PFCDM fabric with the reported PRC materials, PFCDM fabric has excellent radiative cooling performance, but also has good air permeability and self-cleaning performance (Table S2). Therefore, PFCDM fabrics have remarkable innovation and excellent performance in PRC fabrics.

**Table S1** Comparison of PFCDM fabric with previously reported PRC fabric work

| Materials                                                           | Year | Temperature drop (°C) | Cooling power (W m <sup>-2</sup> ) |
|---------------------------------------------------------------------|------|-----------------------|------------------------------------|
| PVDF/TEOS <sup>2</sup>                                              | 2020 | 6                     | 100                                |
| PMMA/CsPbBr <sub>x</sub> I <sub>3-x</sub> quantum dots <sup>3</sup> | 2023 | 4                     | ---                                |
| PVDF <sup>4</sup>                                                   | 2020 | 17.7                  | ---                                |
| CS/SiO <sub>2</sub> <sup>5</sup>                                    | 2023 | 11.2                  | 103.3                              |
| Nano-Ag/PE <sup>6</sup>                                             | 2017 | 7.1                   | ---                                |
| PVDF/PE <sup>7</sup>                                                | 2020 | 6.5                   | 72.78                              |
| HIRC <sup>8</sup>                                                   | 2022 | 5.1                   | 104                                |
| PVDF-HFP/PPy                                                        | 2022 | 4.5                   | 83                                 |
| PTFE <sup>9</sup>                                                   | 2021 | 4.8                   | 50                                 |
| HDPE (this work)                                                    | 2023 | 27.71                 | 104.285                            |

**Table S2** Comparison of PFCDM fabric with previously reported work<sup>10-13</sup>

| Material and structure                                                                                            | Cooling performance<br>(other performance)                                                                                                                                                              | Experiment<br>condition                                                                                         | Application                                | Year |
|-------------------------------------------------------------------------------------------------------------------|---------------------------------------------------------------------------------------------------------------------------------------------------------------------------------------------------------|-----------------------------------------------------------------------------------------------------------------|--------------------------------------------|------|
| Seven layers of HfO <sub>2</sub> and SiO <sub>2</sub>                                                             | 4.9 °C below ambient air temperature and cooling power of 40.1 W m <sup>-2</sup>                                                                                                                        | 850 W m <sup>-2</sup> average solar irradiance                                                                  | Building exterior                          | 2014 |
| A multilayered structure consisting of porous PTFE and a cermet-based spectrally selective absorber               | Provide tunable optical properties, allowing a highly reversible change in solar transmittance of 0.62. Leading to annual cooling and heating savings of around 77% and 27%, respectively               | Under direct solar irradiance                                                                                   | Building exterior                          | 2022 |
| 50 mm-thick polymer glass bead hybrid organic inorganic film and a 200 nm-thick Ag thin film layers               | Cool water to 10.6 °C below ambient and an average cooling power of 607 W m <sup>-2</sup> at noon (12–2 p.m.)                                                                                           | 952 W m <sup>-2</sup> average solar irradiance at 26.5 L (h m <sup>2</sup> ) <sup>-1</sup> volumetric flow rate | Water-based radiative cooling for building | 2019 |
| Five alternating layers of a-Si:H and SiO <sub>2</sub> multilayers coated with 50 µm-thick PDMS layer             | Average 5.2 °C temperature reduction of an inner temperature compares to the transparent selective emitter that transmits most of the incoming solar irradiance under direct sunlight                   | 550 W m <sup>-2</sup> of peak solar irradiance                                                                  | Enclosure                                  | 2021 |
| PDMS layer, Ag layer, and 500 nm-thick micro-patterned quartz layers coated with 10 µm of PDMS from top to bottom | Lowered the temperature of a radiative object inside an enclosure by an average 4 °C compared to a conventional radiative cooler, which is composed of an aluminum plate coated with ~100 µm thick PDMS | 810 W m <sup>-2</sup> average solar power and average humidity of ~44%                                          | Enclosure                                  | 2020 |
| Nano polyethylene                                                                                                 | 2.7 and 2 °C lower skin temperature when covered with nanoPE cloth and with processed nanoPE cloth than when covered with cotton                                                                        | Skin simulator                                                                                                  | Textile                                    | 2016 |
| PTFE/TiO <sub>2</sub> embedded PLA fibers                                                                         | 5, 6.8, 7, 5.8, and 10.2 °C lower than that of the cotton, spandex, chiffon, linen, and bare skin simulator                                                                                             | ~620 W m <sup>-2</sup> of peak solar irradiance                                                                 | Textile                                    | 2021 |
| Polyethylene fibers containing directional microchannels (this work*)                                             | Skin covered by PFCDM fabric is 27.71 °C cooler than bare skin                                                                                                                                          | ~892 W m <sup>-2</sup> of peak solar irradiance                                                                 | Textile                                    | 2023 |
| Porous SEBS                                                                                                       | ~7 °C cooling than non-porous SEBS covered skin                                                                                                                                                         | ~840 W m <sup>-2</sup> of peak solar irradiance                                                                 | Wearable devices                           | 2020 |
| Porous PMMA/SEBS bi-layer                                                                                         | ~7 °C cooling than black elastomer covered skin after 7 min exposure to sunlight                                                                                                                        | ~820 W m <sup>-2</sup> of solar intensity, 18 °C of ambient temperature                                         | Wearable Devices                           | 2021 |

|                                                                                                                                           |   |                                                                                                                                                                                            |                                                                                                                                            |                                    |      |
|-------------------------------------------------------------------------------------------------------------------------------------------|---|--------------------------------------------------------------------------------------------------------------------------------------------------------------------------------------------|--------------------------------------------------------------------------------------------------------------------------------------------|------------------------------------|------|
| Two dimensional SiO <sub>2</sub> micro grating                                                                                            |   | Average 6 °C cooling, leading to absolute increase of 2% in open-circuit voltage for InGaP/GaAs/Ge multi-junction solar cell                                                               | 989 W m <sup>-2</sup> of peak solar intensity and a clear sky                                                                              | Solar cell                         | 2021 |
| Soda-lime glass wafer                                                                                                                     |   | Achieving 5 °C to 36 °C temperature drop and an 8% to 27% relative increase of open-circuit voltage for a GaSb solar cell                                                                  | 5 to 6 W of average heat load on the solar cell                                                                                            | Solar cell                         | 2020 |
| A glass-polymer hybrid film                                                                                                               |   | Output voltage of ~40 mV cm <sup>-2</sup> and an output power of ~10 nW cm <sup>-2</sup>                                                                                                   | ~500 W m <sup>-2</sup> of solar irradiance and ~25 °C of ambient temperature                                                               | TEG                                | 2021 |
| Black paint coated aluminum disk                                                                                                          |   | Cooling 4–5 °C under ambient air (cold side), experimentally 25 mWm <sup>-2</sup> of power generation                                                                                      | Nighttime outdoor condition                                                                                                                | TEG                                | 2019 |
| The structure consists of layers of PDMS and Ag on an aluminum (Al) substrate, with a thickness of 100 μm, 150 nm, and 1 mm               |   | (Condensation rate) below 10 °C of ambient temperature and condensing ~8.5 mL per day                                                                                                      | 800 W m <sup>-2</sup> of peak solar intensity and all the devices were tilted ~15° toward the west to reduce absorption of solar radiation | Dew harvesting                     | 2021 |
| A multi-layer of PDMS 100 μm on 500 μm of glass substrate. The backside of the substrate is coated with 140 nm of Ag and 1 nm of chromium |   | (Condensation rate) 52 g m <sup>-2</sup> h <sup>-1</sup> of dew mass flux is obtained over a period of nearly 3 h                                                                          | 200 W m <sup>-2</sup> of solar irradiance and at a mean RH of 96% in August                                                                | Dew harvesting                     | 2021 |
| W <sub>x</sub> V <sub>1-x</sub> O <sub>2</sub> /BaF <sub>2</sub> 2D grating on Ag                                                         |   | Emissivity from 0.2 for ambient temperatures lower than 15 °C to 0.90 for temperature above 30 °C                                                                                          | Under direct solar irradiance                                                                                                              | Self-adaptive radiative thermostat | 2021 |
| VO <sub>2</sub> /PMMA/Low coated glass                                                                                                    | E | Emissivity from 0.21 to 0.61 at transition temperature of 60 °C                                                                                                                            | Indoor experiment                                                                                                                          | Self-adaptive radiative thermostat | 2021 |
| Cellulose glass                                                                                                                           |   | The long-wavelength infrared emissivity (ε <sub>LWIR</sub> ) for one side is as low as 0.3, to prevent the heat exchange, and the ε <sub>LWIR</sub> of the other side is near unity (0.95) | Under direct solar irradiance                                                                                                              | Smart window                       | 2021 |

**Table S3** UV protection property of different weaving methods

| weaving methods        | UPF   | UVR% |
|------------------------|-------|------|
| Plain weave method     | 70.02 | 4.12 |
| Square knitting method | 60.13 | 4.18 |
| Twill weave method     | 68.87 | 4.32 |
| Satin weave method     | 72.09 | 3.92 |

## References

- 1 Y. Wang, T. Wang, J. Liang, J. Wu, M. Yang, Y. Pan, C. Hou, C. Liu, C. Shen, G. Tao, X. Liu, *Mater. Horiz.* 2023, **10**, 5060-5070.
- 2 X. Wang, X. Liu, Z. Li, H. Zhang, Z. Yang, H. Zhou, T. Fan, *Adv. Funct. Mater.* 2019, **30**, 1907562.
- 3 J. Cao, H. Xu, X. Li, Y. Gu, *ACS Appl. Mater. Interfaces* 2023, **15**, 19480.
- 4 Y. N. Song, M. Q. Lei, J. Lei, Z. M. Li, *Mater. Today Energy* 2020, **18**, 100504.
- 5 C. Chen, X. Jia, X. Li, M. Shi, J. Hu, M. Song, S. Wu, H. Dai, X. Wang, H. Geng, *Chem. Eng. J.* 2023, **475**, 146307.
- 6 L. Cai, A. Y. Song, P. Wu, P.-C. Hsu, Y. Peng, J. Chen, C. Liu, P. B. Catrysse, Y. Liu, A. Yang, C. Zhou, C. Zhou, S. Fan, Y. Cui, *Nat. Commun.* 2017, **8**, 496.
- 7 Y.-N. Song, Y. Li, D.-X. Yan, J. Lei, Z.-M. Li, *Compos, Part A-Appl. S* 2020, **130**, 105738.
- 8 Y. Tian, X. Liu, Z. Wang, J. Li, Y. Mu, S. Zhou, F. Chen, M. L. Minus, G. Xiao, Y. Zheng, *Nano Energy* 2022, **96**, 107085.
- 9 S. P. Shaoning Zeng, Minyu Su, Zhuning Wang, Maoqi Wu, Xinhang Liu, Mingyue Chen, Yuanzhuo Xiang, Jiawei Wu, Manni Zhang, Qingqing Cen, Yuwei Tang, Xianheng Zhou, Zhiheng Huang, Rui Wang, Alitenai Tunuhe, Xiyu Sun, Zhigang Xia, Mingwei Tian, Min Chen, Xiao Ma, Lvyun Yang, Jun Zhou, Huamin Zhou, Qing Yang, Xin Li, Yaoguang Ma, Guangming Tao, *Science* 2021, **373**, 692.
- 10 X. Zhang, W. Yang, Z. Shao, Y. Li, Y. Su, Q. Zhang, C. Hou, H. Wang, *ACS Nano* 2022, **16**, 2188-2197.
- 11 Y. Sun, Y. Ji, M. Javed, X. Li, Z. Fan, Y. Wang, Z. Cai, B. Xu, *Advanced Materials Technologies* 2021, **7**, 2100803.
- 12 Y. Ji, Y. Sun, J. Muhammad, X. Li, Z. Liu, P. Tu, Y. Wang, Z. Cai, B. Xu, *Macromolecular Materials and Engineering* 2022, **307**, 2100795.
- 13 E. Pakdel, X. Wang, *Materials & Design* 2023, **231**, 112006.
